# Supplementary material for: Short-Term Periodic Fasting Reduces Ischemia-Induced Necrosis in Musculocutaneous Flap Tissue
Source: MDPI journal article supplement (doi:10.3390/biomedicines12030690), 2024-03-20
Supplement: s1 [file s1]

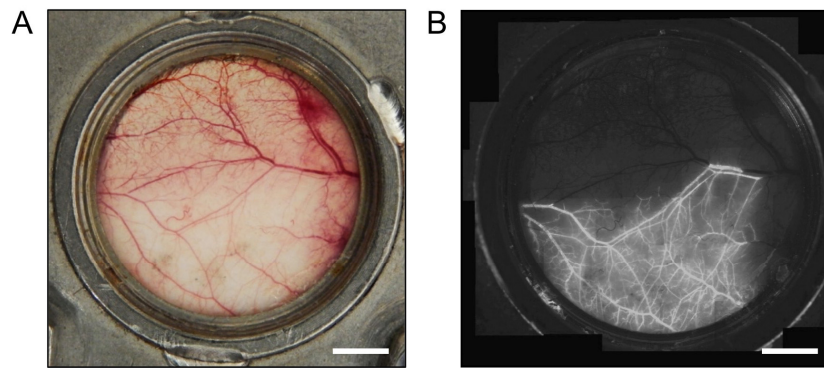

**Supplementary Material Figure S1.** Exemplary macroscopic image (A) of an untreated control flap with the corresponding intravital fluorescent microscopic image (B) on day 1 after flap elevation. Scale bars: 2 mm.
